# Supplementary material for: Screening of folate-producing lactic acid bacteria and modulatory effects of folate-biofortified yogurt on gut dysbacteriosis of folate-deficient rats
Source: Royal Society of Chemistry journal article supplement (doi:10.1039/d0fo00480d), 2020-01-01
Supplement: d0fo00480d1.pdf [file d0fo00480d1.pdf]

Supplementary Materials for  
**Modulation effect of yogurt fermented with  
folate-producing lactic acid bacteria on gut  
dysbacteriosis of folate deficient rat**

Jian Zhang <sup>a</sup>, Dongyan Cai <sup>a</sup>, Ming Yang <sup>a</sup>, Yijiang Hao <sup>a</sup>, Yuanhua Zhu <sup>a</sup>, Tariq Aziz

<sup>a</sup>, Abid Sarwar <sup>a</sup>, Zhennai Yang <sup>a\*</sup>

<sup>a</sup> Beijing Advanced Innovation Center for Food Nutrition and Human Health, Beijing Engineering and Technology Research Center of Food Additives, Beijing Technology and Business University, Beijing 100048, China

This file includes:

Supplementary Figure S1, Table S1 to S3.

---

\* Corresponding author: Tel.: +86 10 68984870; Fax: +86 10 68985456; Email:

yangzhennai@th.btbu.edu.cn

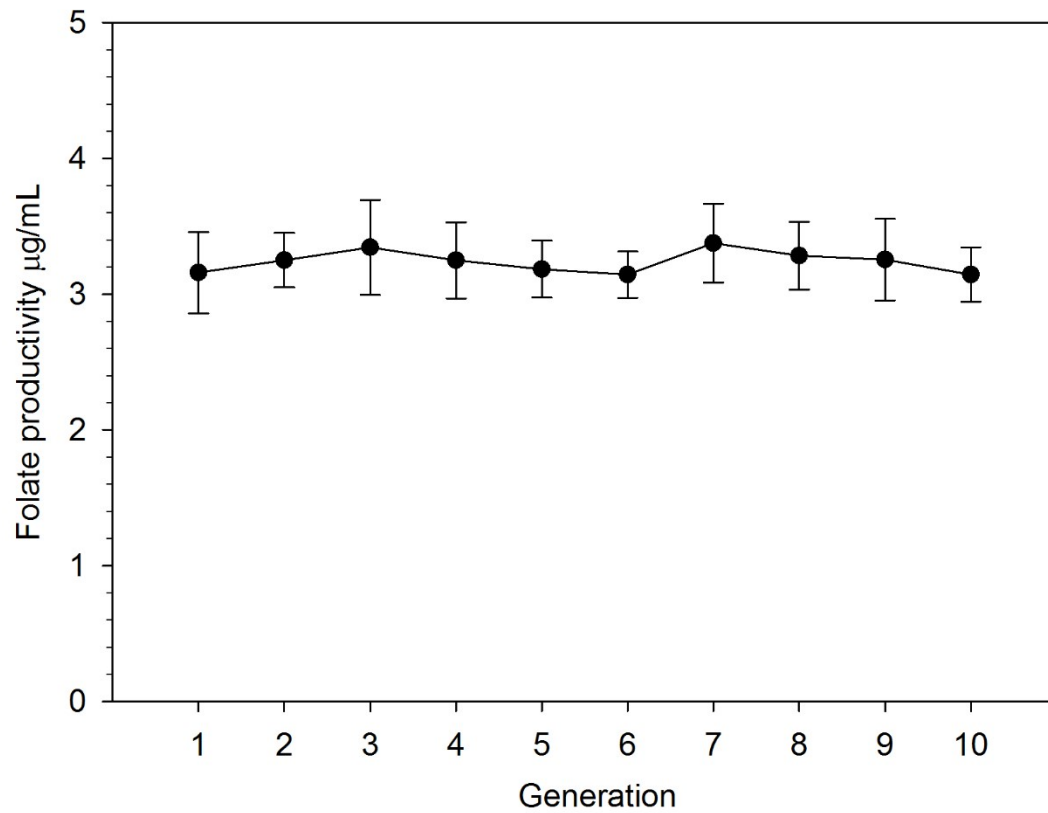

Figure S1. The folate productivity of *L. plantarum* GSLP-7V in milk in the 10-generation successive cultivation. Error bar represents the standard deviation. Values between the generations are not significant ( $P < 0.05$ )

Table S1 Information of the strains

| Species of strain                           | Strain number | Isolation source | GenBank accession number |
|---------------------------------------------|---------------|------------------|--------------------------|
|                                             | GSLP-7        | Kefir            | GCA_003020005.1          |
| <i>Lactobacillus</i>                        | YW11          | Kefir            | GCA_004028295.1          |
| <i>plantarum</i>                            | YW32          | Kefir            | GCA_004123035.1          |
| ( <i>L. plantarum</i> )                     | B-1           | Kefir            | GCA_004122965.1          |
|                                             | SKT-109       | Kefir            | GCA_004025165.1          |
| <i>Lactobacillus</i>                        | YNF-5         | Kefir            | GCA_004122955.1          |
| <i>bulgaricus</i>                           | KW14-3        | Kefir            | GCA_004123065.1          |
| ( <i>L. bulgaricus</i> )                    |               |                  |                          |
| <i>Lactobacillus lactis</i>                 |               |                  |                          |
| subsp. <i>lactis</i>                        | XZ3303        | Kefir            | GCA_004123095.1          |
| ( <i>L. lactis</i> subsp. <i>lactis</i> )   |               |                  |                          |
| <i>Lactobacillus lactis</i>                 |               |                  |                          |
| subsp. <i>cremoris</i>                      | QH27-1        | Kefir            | GCA_004123105.1          |
| ( <i>L. lactis</i> subsp. <i>cremoris</i> ) |               |                  |                          |
| <i>Pediococcus</i>                          |               |                  |                          |
| <i>pentosaceus</i>                          | 6-1           | Kefir            | GCA_004115445.1          |
| ( <i>P. pentosaceus</i> )                   |               |                  |                          |
| <i>Lactobacillus</i>                        |               |                  |                          |
| <i>rhamnosus</i>                            | 5-1           | Kefir            | GCA_004122925.1          |
| ( <i>L. rhamnosus</i> )                     |               |                  |                          |
| <i>Lactobacillus casei</i>                  |               |                  |                          |
| ( <i>L. casei</i> )                         | 6117          | Kefir            | GCA_004123005.1          |

“-” unregistered in NCBI database

Table S2 Rat diet composition<sup>a</sup>

| Ingredients (g/kg)               | with folate | folate free |
|----------------------------------|-------------|-------------|
| L-Arginine                       | 6           | 6           |
| L-Histidine-HCl-H <sub>2</sub> O | 4.6         | 4.6         |
| L-Isoleucine                     | 7.6         | 7.6         |
| L-Leucine                        | 15.8        | 15.8        |
| L-Lysine-HCl                     | 13.2        | 13.2        |
| L-Methionine                     | 5.1         | 5.1         |
| L-Phenylalanine                  | 8.4         | 8.4         |
| L-Threonine                      | 7.2         | 7.2         |
| L-Tryptophan                     | 2.1         | 2.1         |
| L-Valine                         | 9.3         | 9.3         |
| L-Alanine                        | 5.1         | 5.1         |
| L-Asparagine-H <sub>2</sub> O    | 6.7         | 6.7         |
| L-Aspartate                      | 5.4         | 5.4         |
| L-Cystine                        | 4.2         | 4.2         |
| L-Glutamic Acid                  | 21.7        | 21.7        |
| L-Glutamine                      | 16.5        | 16.5        |
| Glycine                          | 3           | 3           |
| L-Proline                        | 17.8        | 17.8        |
| L-Serine                         | 10          | 10          |
| L-Tyrosine                       | 9.2         | 9.2         |
| Total L-Amino Acids              | 178.9       | 178.9       |
| Corn Starch                      | 397.486     | 397.486     |
| Maltodextrin                     | 132         | 132         |
| Sucrose                          | 107.0777    | 107.0777    |
| Cellulose                        | 50          | 50          |
| Soybean                          | 70          | 70          |
| t-butylhydroquinone              | 0.014       | 0.014       |
| Mineral Mix S10022C              | 3.5         | 3.5         |
| Calcium Carbonate                | 7.34        | 7.34        |
| Potassium Citrate                | 2.4773      | 2.4773      |
| Potassium Phosphate, Monobasic   | 6.86        | 6.86        |
| Calcium Phosphate, dibasic       | 7           | 7           |
| Sodium Chloride                  | 2.59        | 2.59        |
| Sodium Bicarbonate               | 7.5         | 7.5         |
| Folic acid (ppm)                 | 2           | 0           |

<sup>a</sup> design according to the standard of AIN-93G.

Table S3 Factor loadings of PC1 and PC2 coordinates

| Genus                        | PC1    | PC2    |
|------------------------------|--------|--------|
| Actinomyces                  | 0.641  | 0.185  |
| Adlercreutzia                | 0.076  | 0.627  |
| Akkermansia                  | 0.131  | 0.019  |
| Allobaculum                  | -0.203 | 0.475  |
| Anaeroplasma                 | -0.242 | -0.565 |
| Anaerotruncus                | -0.069 | 0.623  |
| Bacteroides                  | -0.608 | -0.257 |
| Blautia                      | -0.529 | 0.160  |
| Butyricicoccus               | -0.253 | 0.240  |
| Christensenella              | -0.151 | 0.106  |
| Clostridium                  | -0.471 | -0.535 |
| Coprobacillus                | -0.233 | 0.237  |
| Coprococcus                  | -0.347 | 0.677  |
| Dehalobacterium              | -0.109 | 0.527  |
| Dorea                        | -0.342 | 0.526  |
| Eggerthella                  | -0.218 | -0.543 |
| Enterococcus                 | 0.252  | -0.416 |
| Epulopiscium                 | -0.326 | -0.350 |
| Eubacterium                  | -0.561 | -0.232 |
| Gemella                      | 0.738  | 0.170  |
| Helicobacter                 | -0.209 | -0.231 |
| Holdemania                   | -0.503 | -0.207 |
| Lactobacillus                | 0.751  | -0.173 |
| Oscillospira                 | -0.360 | 0.549  |
| p_75_a5                      | -0.028 | 0.515  |
| Parabacteroides              | -0.277 | 0.033  |
| Peptostreptococcus           | 0.226  | 0.483  |
| Pseudoramibacter_Eubacterium | -0.175 | 0.086  |
| rc4_4                        | -0.374 | 0.288  |
| Roseburia                    | -0.326 | 0.226  |
| Rothia                       | 0.708  | 0.079  |
| Ruminococcus                 | -0.223 | -0.107 |
| Shuttleworthia               | -0.210 | 0.021  |
| SMB53                        | -0.548 | -0.406 |
| Staphylococcus               | 0.758  | 0.046  |
| Streptococcus                | 0.271  | 0.378  |
| Sutterella                   | -0.456 | 0.245  |
| Turicibacter                 | 0.347  | -0.377 |
| V2                           | -0.429 | 0.409  |
